# Supplementary material for: Short-Term Chromium-Stress-Induced Alterations in the Maize Leaf Proteome
Source: PubMed Central journal article supplement (PMC3709723; doi:10.3390/ijms140611125), 2013-05-27
Supplement: ijms-14-11125-s001.pdf [file ijms-14-11125-s001.pdf]

# Supplementary Information

**Figure S1.** The expression profiles of the differentially accumulated protein spots during Cr stress treatment. The X-axis stands for time points. The Y-axis stands for the average relative spot volumes (%vol) of each protein spots and the data represent the mean values and SE of at least three independent experiments.

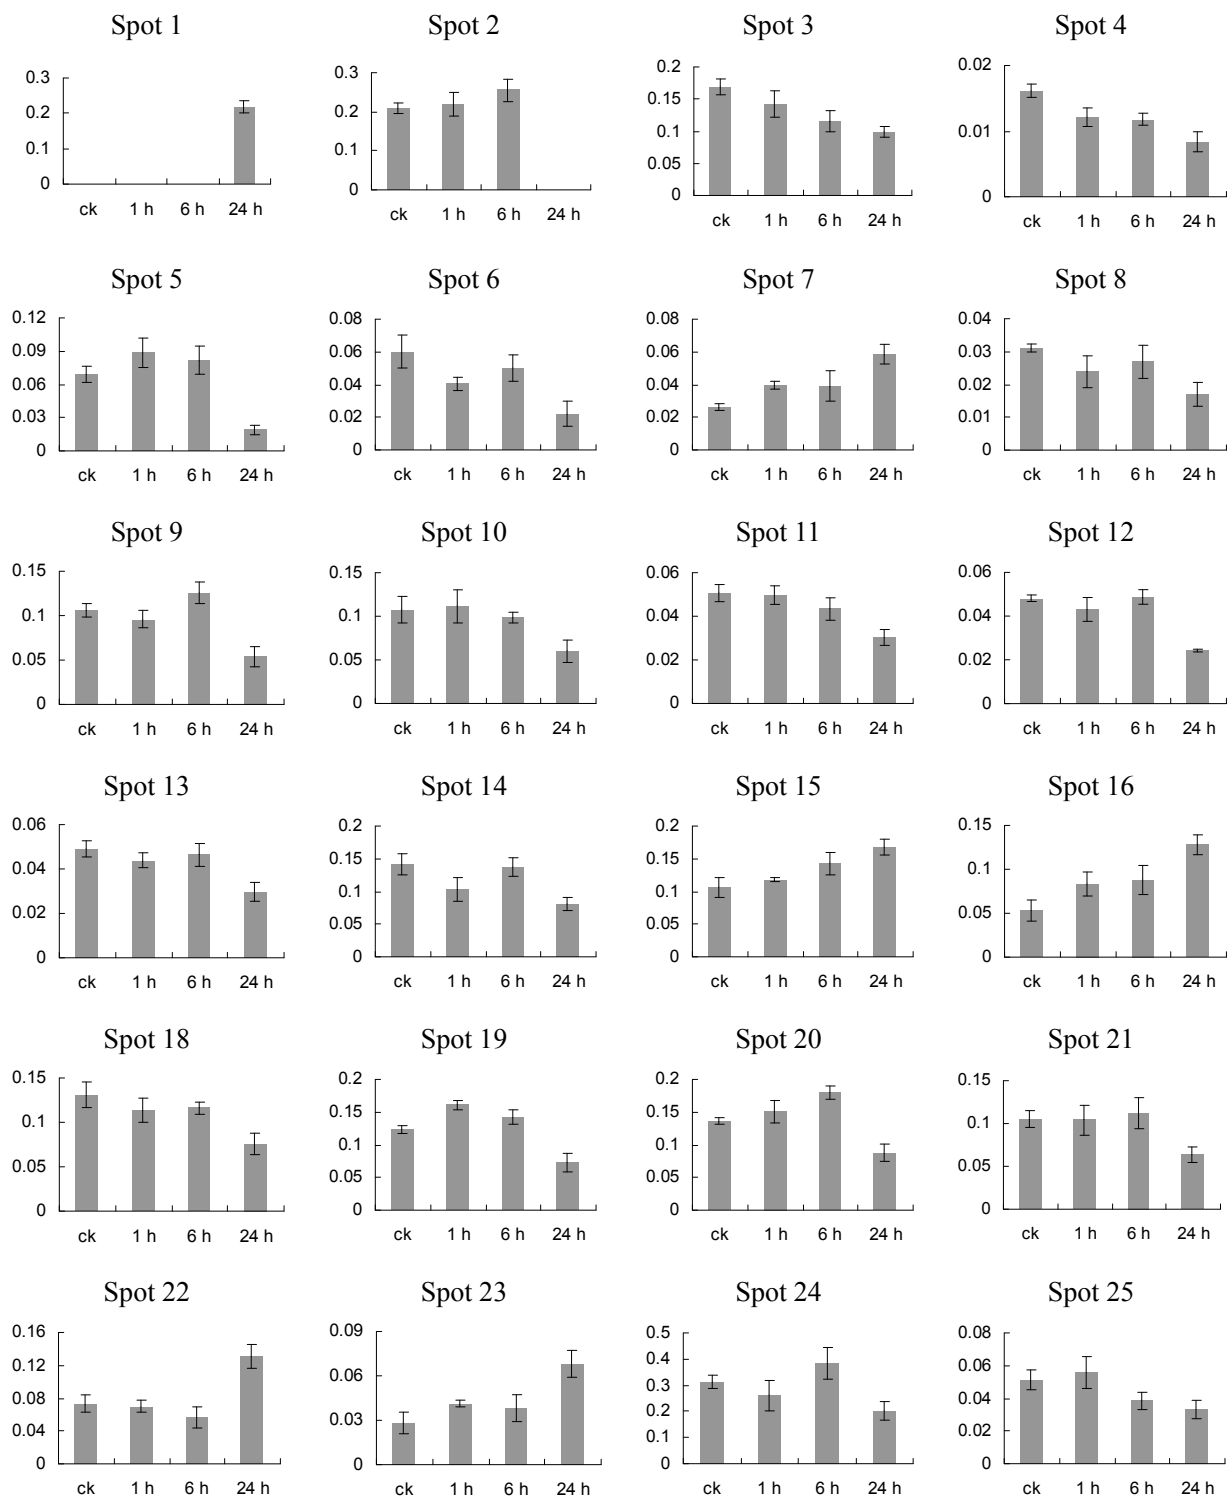

Figure S1. Cont.

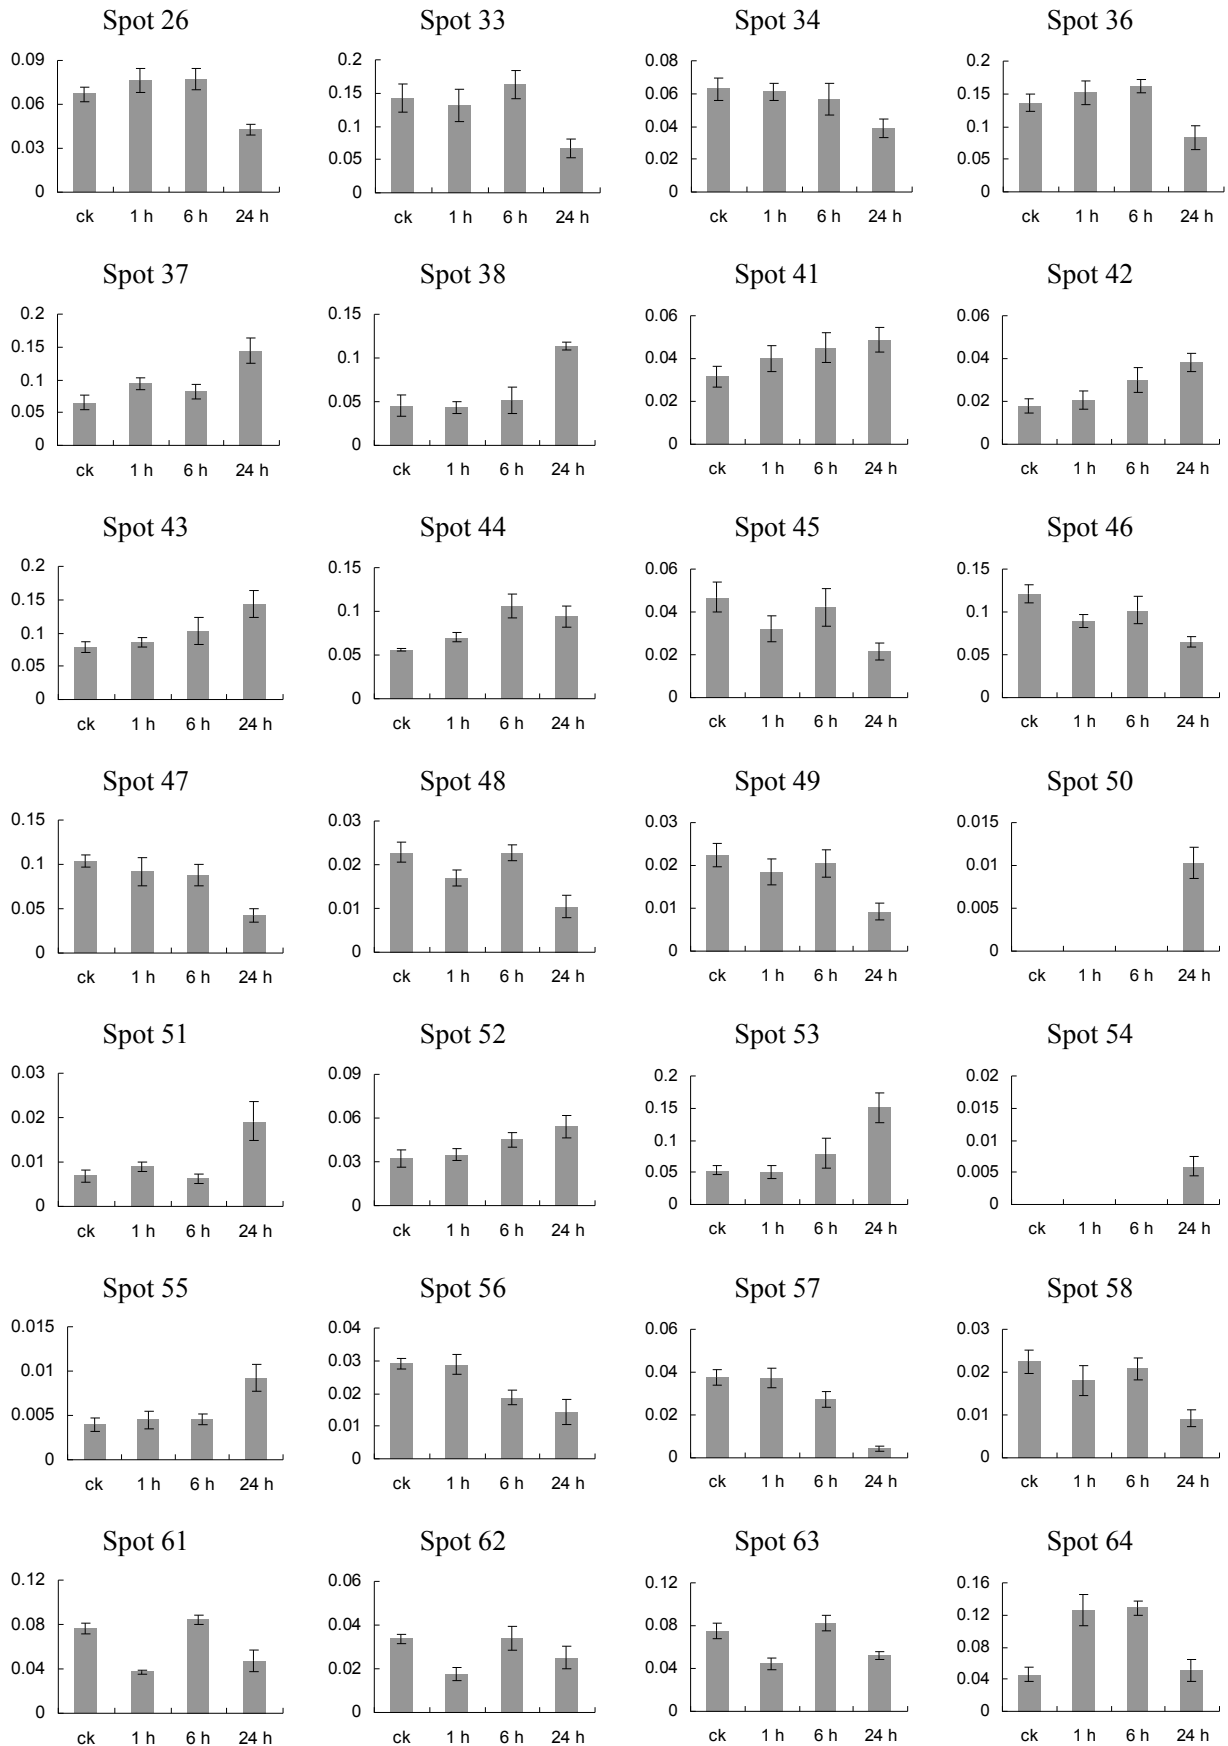

Figure S1. Cont.

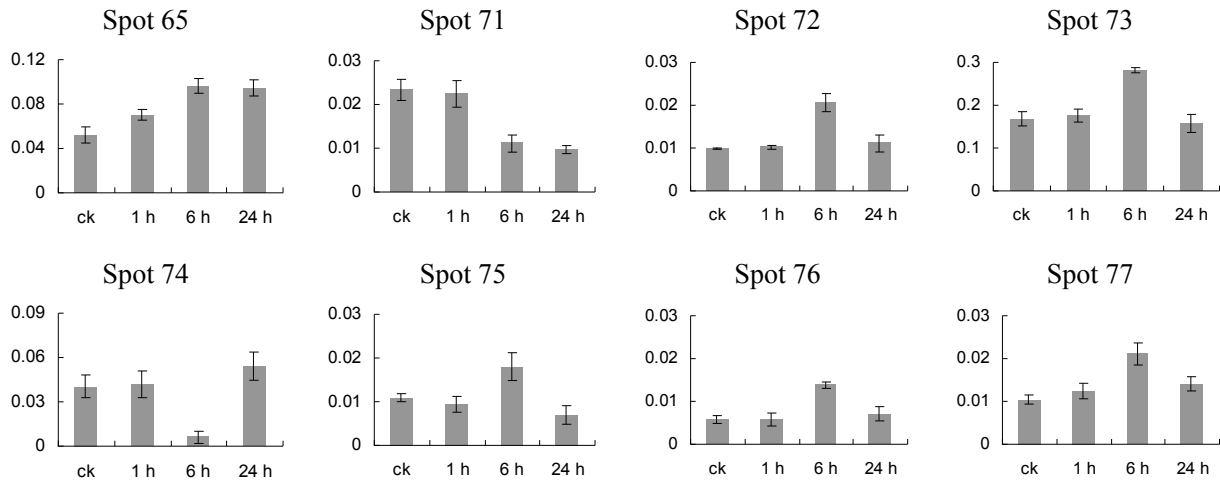

© 2013 by the authors; licensee MDPI, Basel, Switzerland. This article is an open access article distributed under the terms and conditions of the Creative Commons Attribution license (<http://creativecommons.org/licenses/by/3.0/>).
